# Supplementary material for: The NEDD8-activating enzyme inhibitor MLN4924 sensitizes a TNFR1+ subgroup of multiple myeloma cells for TNF-induced cell death
Source: PubMed Central journal article supplement (PMC6690881; doi:10.1038/s41419-019-1860-2), 2019-08-13
Supplement: 41419_2019_1860_MOESM1_ESM.pdf [file 41419_2019_1860_MOESM1_ESM.pdf]

## SUPPLEMENTAL DATA

### Supplemental figure 1

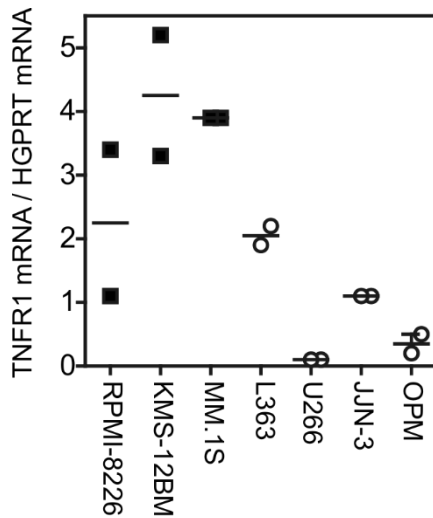

Two independently obtained total RNA samples of each of the three MM cell lines with high TNFR1 mRNA levels from the microarray mRNA analysis shown in figure 6D (filled squares, RPMI-8226, KMS-12BM and MM.1S) as well as two independent samples for each of four cell lines with low TNFR1 expression (white circles, L363, U266 JLN3 and OPM) were analyzed by qRT-PCR for TNFR1 expression.

Total RNAs were isolated with the RNeasy mini kit (Quiagen, Valencia, CA, USA) according to manufacturer's instructions. Two micrograms of total RNA were transcribed into complementary DNA using the high-capacity cDNA reverse transcription kit (Applied Biosystems, Carlsbad, CA, USA). *Tnfrsf1a* mRNA levels were quantified using the TaqMan human *Tnfrsf1a* (Hs01042313\_m1) gene expression assay (Applied Biosystems) and an ABI Prism 7900 sequence detector (Applied Biosystems). qRT-PCR reactions were performed in quadruplicates for each sample and were normalized to the expression of the housekeeping gene *Hprt1* (Hs02800695\_m1). mRNA levels were calculated using the SDS 2.1 software (Applied Biosystems).

**Supplemental table I**

Expression of TNFR1 and GAPDH mRNA in MM cell lines determined by microarray analysis. For comparison absolute TNFR1 number derived from binding studies of figure 6 were included.

| <b>Cell line</b> | <b>Log 2 mRNA signal</b> |              | <b>TNFR1/cell</b> |
|------------------|--------------------------|--------------|-------------------|
|                  | <b>TNFR1</b>             | <b>GAPDH</b> |                   |
| <b>JJN3</b>      | 7,693583                 | 15,441320    | 70                |
| <b>AMO1</b>      | 6,835048                 | 15,170820    | 130               |
| <b>INA6</b>      | 7,958666                 | 14,924380    | 440               |
| <b>KMS11</b>     | 8,362409                 | 14,794290    | 50                |
| <b>KMS12B</b>    | 11,244920                | 14,777420    | 1460              |
| <b>L363</b>      | 7,083690                 | 15,613360    | 50                |
| <b>MM1.S</b>     | 10,568790                | 15,579100    | 1540              |
| <b>OPM</b>       | 8,848711                 | 15,614340    | 370               |
| <b>RPMI</b>      | 9,090881                 | 14,772400    | 2190              |
| <b>U266</b>      | 6,426434                 | 15,230370    | 110               |

**Supplemental table II**

Mutations in the TNFRSF1A, TRAF2 and TRAF3 genes in the CoMMpass (Relating Clinical Outcomes in MM to Personal Assessment of Genetic Profile) data base with 1440 patients.

| Gene     | Patient  | Mutation        | Change Type               | Frequency (%) |
|----------|----------|-----------------|---------------------------|---------------|
| TNFR1    | MMRF1434 | T358M           | missense variant          | 0,14          |
|          | MMRF2068 | T411M           | missense variant          |               |
| TRAF2    | MMRF1180 | p.Q67*          | stop gained               | 1,25          |
|          | MMRF1180 | p.T186fs        | frameshift variant        |               |
|          | MMRF1586 | p.E531*         | stop gained               |               |
|          | MMRF1602 | D93H            | missense variant          |               |
|          | MMRF1625 | p.S411*         | stop gained               |               |
|          | MMRF1801 | D93N            | missense variant          |               |
|          | MMRF1822 | 9:139794125 G>A | splice                    |               |
|          | MMRF1917 | p.E210*         | stop gained               |               |
|          | MMRF1965 | F433L           | missense variant          |               |
|          | MMRF1999 | S89L            | missense variant & splice |               |
|          | MMRF2041 | p.Q509*         | stop gained               |               |
|          | MMRF2166 | p.Q67*          | stop gained               |               |
|          | MMRF2166 | p.E79*          | stop gained               |               |
|          | MMRF2166 | E101K           | missense variant          |               |
|          | MMRF2201 | C112S           | missense variant          |               |
|          | MMRF2201 | T113A           | missense variant          |               |
|          | MMRF2307 | R42L            | missense variant          |               |
| MMRF2341 | p.E187*  | stop gained     |                           |               |
| TRAF3    | MMRF1078 | D463N           | missense variant          | 4,9           |
|          | MMRF1078 | D552H           | missense variant          |               |
|          | MMRF1128 | C76S            | missense variant          |               |
|          | MMRF1252 | p.E41fs         | frameshift variant        |               |
|          | MMRF1261 | p.A327fs        | frameshift variant        |               |
|          | MMRF1285 | p.E174*         | stop gained               |               |
|          | MMRF1327 | p.K52fs         | frameshift variant        |               |
|          | MMRF1388 | p.Q294*         | stop gained               |               |
|          | MMRF1413 | H136L           | missense variant          |               |
|          | MMRF1413 | p.L137*         | stop gained               |               |
|          | MMRF1497 | Y51fs           | frameshift variant        |               |
|          | MMRF1506 | G462W           | missense variant          |               |
|          | MMRF1534 | Y39C            | missense variant          |               |
|          | MMRF1572 | L543Q           | missense variant          |               |
|          | MMRF1605 | p.R341fs        | frameshift variant        |               |
|          | MMRF1668 | T469K           | missense variant          |               |
|          | MMRF1672 | p.T46fs         | frameshift variant        |               |
|          | MMRF1705 | G462R           | missense variant          |               |
|          | MMRF1723 | D552Y           | missense variant          |               |
|          | MMRF1725 | p.S85fs         | frameshift variant        |               |
|          | MMRF1749 | S563W           | missense variant          |               |
|          | MMRF1749 | p.D564fs        | frameshift variant        |               |
|          | MMRF1778 | p.L496fs        | frameshift variant        |               |
|          | MMRF1778 | p.Q342*         | stop gained               |               |
|          | MMRF1785 | I477F           | missense variant          |               |
|          | MMRF1785 | p.Q492*         | stop gained               |               |
|          | MMRF1796 | p.E346*         | stop gained               |               |
|          | MMRF1796 | D348H           | missense variant          |               |
|          | MMRF1796 | D510N           | missense variant          |               |
|          | MMRF1810 | p.K429*         | stop gained               |               |
|          | MMRF1823 | W420R           | missense variant          |               |
|          | MMRF1823 | L473P           | missense variant          |               |
|          | MMRF1823 | F474V           | missense variant          |               |

|          |                    |                      |
|----------|--------------------|----------------------|
| MMRF1833 | p.Q407*            | stop gained          |
| MMRF1891 | S442R              | missense variant     |
| MMRF1891 | p.Y482*            | stop gained          |
| MMRF1908 | p.C177fs           | frameshift variant   |
| MMRF1911 | 14:103338307 T>A   | splice               |
| MMRF1967 | p.Q14*             | stop gained          |
| MMRF1999 | F445L              | missense variant     |
| MMRF1999 | D483N              | missense variant     |
| MMRF2041 | p.S84*             | stop gained          |
| MMRF2041 | p.R310*            | stop gained          |
| MMRF2058 | p.R321*            | stop gained & splice |
| MMRF2097 | Y548N              | missense variant     |
| MMRF2097 | p.Y548*            | stop gained          |
| MMRF2118 | C88W               | missense variant     |
| MMRF2118 | R428Q              | missense variant     |
| MMRF2132 | p.W344*            | stop gained          |
| MMRF2144 | p.Y39fs            | frameshift variant   |
| MMRF2151 | V494G              | missense variant     |
| MMRF2166 | 14:103336521 G>A   | splice               |
| MMRF2170 | E313fs             | frameshift variant   |
| MMRF2197 | p.W488*            | stop gained          |
| MMRF2209 | p.R310*            | stop gained          |
| MMRF2211 | p.G416fs           | frameshift variant   |
| MMRF2213 | 14:103338307 T>G   | splice               |
| MMRF2224 | p.E54*             | stop gained          |
| MMRF2265 | p.Thr553 Ile556del | inframe deletion     |
| MMRF2271 | p.R163*            | stop gained          |
| MMRF2271 | p.M497fs           | frameshift variant   |
| MMRF2352 | I323L              | missense variant     |
| MMRF2352 | p.Q326fs           | frameshift variant   |
| MMRF2352 | p.Q501*            | stop gained          |
| MMRF2377 | D98G               | missense variant     |
| MMRF2428 | L418P              | missense variant     |
| MMRF2457 | V59E               | missense variant     |
| MMRF2515 | W488C              | missense variant     |
| MMRF2525 | p.Y452fs           | frameshift variant   |
| MMRF2601 | D463N              | missense variant     |

**Supplemental table III**

Flow cytometry results (percent cells in each quadrant of AV/PI staining) of all primary MM samples and treatments. Quadrant 4 results showing double-negative viable cells are highlighted with a grey background.

| Sample # | DMSO             |                  |                  |                  | TNF              |                  |                  |                  | MLN              |                  |                  |                  | TNF + MLN        |                  |                  |                  |
|----------|------------------|------------------|------------------|------------------|------------------|------------------|------------------|------------------|------------------|------------------|------------------|------------------|------------------|------------------|------------------|------------------|
|          | Q1<br>Ax-<br>PI+ | Q2<br>Ax+<br>PI+ | Q3<br>Ax+<br>PI- | Q4<br>Ax-<br>PI- | Q1<br>Ax-<br>PI+ | Q2<br>Ax+<br>PI+ | Q3<br>Ax+<br>PI- | Q4<br>Ax-<br>PI- | Q1<br>Ax-<br>PI+ | Q2<br>Ax+<br>PI+ | Q3<br>Ax+<br>PI- | Q4<br>Ax-<br>PI- | Q1<br>Ax-<br>PI+ | Q2<br>Ax+<br>PI+ | Q3<br>Ax+<br>PI- | Q4<br>Ax-<br>PI- |
| 1        | 2,1              | 14,6             | 16,3             | 67               | 2,5              | 13,6             | 14,4             | 69,6             | 2,5              | 13,7             | 13,7             | 70,1             | 3,4              | 17,3             | 19,1             | 60,2             |
| 2        | 0,9              | 34,3             | 23,3             | 41,5             | 1,3              | 31,2             | 27               | 40,6             | 1,5              | 29               | 37,4             | 32,1             | 0,4              | 31,2             | 59,4             | 9                |
| 3        | 0,3              | 11,2             | 8,3              | 80,2             | 0,3              | 13,6             | 11,6             | 74,6             | 0,3              | 10,1             | 7,8              | 81,8             | 0,1              | 41,2             | 45,3             | 13,5             |
| 4        | 0,8              | 22,2             | 12,9             | 64,1             | 0,3              | 17,7             | 15,7             | 66,3             | 0,5              | 21,8             | 20,5             | 57,1             | 0,3              | 17,7             | 15,7             | 66,3             |
| 5        | 1,5              | 42,9             | 5,6              | 51               | 2,1              | 42,7             | 5,7              | 49,5             | 1,5              | 47,3             | 6,7              | 44,5             | 0,9              | 50,2             | 7,7              | 41,2             |
| 6        | 0,9              | 31,8             | 5,1              | 62,2             | 0,3              | 33,5             | 4,7              | 61,5             | 0,9              | 31,1             | 4,2              | 64,8             | 0,4              | 34,5             | 5,1              | 60               |
| 7        | 0,6              | 16,4             | 47,5             | 35,6             | 0,3              | 17,7             | 45,4             | 36,6             | 0,1              | 16               | 38,7             | 45,2             | 0,1              | 33,9             | 53,1             | 12,9             |
| 8        | 3,3              | 13,2             | 43,2             | 40,3             | 2                | 13,5             | 44,3             | 40,2             | 2,9              | 17,3             | 45,6             | 34,1             | 0,7              | 17,7             | 65,9             | 15,7             |
| 9        | 0,3              | 15,5             | 12,1             | 72,1             | 0,2              | 18               | 12,8             | 69               | 0                | 19,8             | 15,6             | 64,6             | 0,1              | 20,5             | 17,1             | 62,4             |
| 10       | 1,7              | 38,4             | 3,7              | 56,2             | 1,6              | 39,9             | 4,4              | 54,1             | 1,3              | 37,6             | 4,5              | 56,6             | 0,7              | 49,4             | 9                | 40,8             |
| 11       | 0,3              | 7,2              | 15,1             | 77,4             | 0,1              | 7                | 16,9             | 76               | 0,5              | 10,1             | 28,2             | 61,3             | 0,2              | 15,7             | 57,8             | 26,3             |
| 12       | 0,9              | 7,8              | 9,4              | 81,9             | 1,8              | 8,8              | 11,1             | 78,3             | 1,9              | 18               | 19,2             | 60,9             | 1,7              | 34,3             | 36               | 28               |
| 13       | 0,3              | 19,3             | 26,4             | 54               | 0,3              | 24,9             | 28,4             | 46,4             | 0,2              | 24,1             | 24,6             | 51,2             | 3,9              | 20,9             | 23,8             | 51,4             |
| average  | 1                | 21               | 18               | 60               | 1                | 22               | 19               | 59               | 1                | 23               | 21               | 56               | 1                | 30               | 32               | 38               |

## Supplemental Methods

### Mass spectrometry

For a detailed description please see supplemental methods in supplemental data. Cells were cultivated for > 7 days in proline supplemented RPMI1640 medium for SILAC (Thermo Fisher Scientific) with conventional or heavy ( $^{13}\text{C}_6$ ) L-arginine and ( $^{13}\text{C}_6$ ) L-lysine (Thermo Fisher Scientific). “Heavy” labeled cells were stimulated with 20  $\mu\text{M}$  MLN4924 overnight and “light” cells remained untreated. After three washes cells were pairwise combined and subjected to lysis in NuPAGE® LDS sample buffer (Life Technologies). Samples were reduced in with 50 mM DTT at 70 °C for 10 minutes and alkylated with 120 mM Iodoacetamide at room temperature for 20 minutes. Separation was performed on NuPAGE® Novex® 4-12 % Bis-Tris gels (Life Technologies) with MOPS buffer according to manufacturer’s instructions. Washed gels (3 x 5 min water) were stained for 1 h with Simply Blue™ Safe Stain (Life Technologies) and after washing with water for 1 h, each gel lane was cut into 15 slices. The slices were destained with 30 % acetonitrile in 0.1 M  $\text{NH}_4\text{HCO}_3$  (pH 8), shrunk with 100 % acetonitrile, and dried in a vacuum concentrator (Concentrator 5301, Eppendorf, Germany). Samples were digested with 0.1  $\mu\text{g}$  trypsin (overnight, 37 °C in 0.1 M  $\text{NH}_4\text{HCO}_3$ , pH 8). After removing the supernatant, peptides were extracted from the gel slices with 5 % formic acid, and pooled with the corresponding supernatant. NanoLC-MS/MS analyses were performed on an LTQ-Orbitrap Velos Pro (Thermo Scientific) equipped with an EASY-Spray Ion Source and coupled to an EASY-nLC 1000 (Thermo Scientific). Peptides were loaded on a trapping column (2 cm x 75  $\mu\text{m}$  ID, PepMap C18, 3  $\mu\text{m}$  particles, 100 Å pore size) and separated on an EASY-Spray column (25 cm x 75  $\mu\text{m}$  ID, PepMap C18, 2  $\mu\text{m}$  particles, 100 Å pore size) with a 120-minute linear gradient from 3% to 30% acetonitrile and 0.1% formic acid. MS scans were acquired in the Orbitrap analyzer with a resolution of 30,000 at  $m/z$  400, MS/MS scans were acquired in the Ion Trap analyzer with normal scan rate using CID fragmentation with 35% normalized collision energy. A TOP10 data-dependent MS/MS method was used; dynamic exclusion was

applied with a repeat count of 1 and an exclusion duration of 120 seconds; singly charged precursors were excluded from selection. Minimum signal threshold for precursor selection was set to 20,000. AGC was used with AGC target with a value of 1e6 for MS scans and 1e4 for MS/MS scans. Lock mass option was applied for internal calibration in all runs using background ions from protonated decamethylcyclopentasiloxane ( $m/z$  371.10124). For MS raw data file processing, database searches and quantification, MaxQuant version 1.4.1.2 was used<sup>48</sup>. The search was performed against the UniProt Human database. Additionally, a database containing common contaminants was used. Protein identification was under control of the false-discovery rate (<1% FDR on protein and peptide level). In addition to MaxQuant default settings, the search was performed with tryptic cleavage specificity with three allowed missed cleavages. The search was performed with the following variable modifications: Gln to pyro-Glu formation and oxidation (on Met). H/L ratios were used for protein quantitation (at least two peptides per protein).
